# Supplementary material for: CIAlign: A highly customisable command line tool to clean, interpret and visualise multiple sequence alignments
Source: PeerJ. 2022 Mar 15;10:e12983. doi: 10.7717/peerj.12983 (PMC8932311; doi:10.7717/peerj.12983)
Supplement: Supplemental Information 8 — Relaxed, moderate and stringent parameter settings used for benchmarking with EvolvAGene (Bahr et al., 2001), INDELible (Sievers & Higgins, 2018), BadRead (Sievers & Higgins, 2020), BAliBASE (Thompson, Plewniak & Poch, 1999), HomFam (Wright, 2015) and QuanTest2 (Finn et al., 2014). [file peerj-10-12983-s008.xlsx]

## Sheet: Supplementary_Table_1
Parameter	Default	EvolvAGene – Stringent	EvolvAGene – Moderate	EvolvAGene – Relaxed	INDELible – Stringent	INDELible – Moderate	INDELible – Relaxed	BadRead – Moderate	BAliBase – Stringent	BAliBase – Moderate	BAliBase – Relaxed	HomFam	QuanTest2
crop_ends_mingap_perc	0.05	0.01	0.02	0.05	0.01	0.02	0.05	0.02	0.01	0.02	0.05	0.05	0.05
remove_divergent_minperc	0.65	0.7	0.65	0.5	0.5	0.4	0.4	0.25	0.25	0.2	0.15	0.15	0.15
insertion_min_size	3	1	3	5	1	3	5	3	1	3	5	3	3
insertion_max_size	200	100	100	100	100	100	100	100	100	100	100	200	200
remove_min_length	50	100	50	50	75	50	50	50	75	50	50	50	50
