# Supplementary material for: CIAlign: A highly customisable command line tool to clean, interpret and visualise multiple sequence alignments
Source: PeerJ. 2022 Mar 15;10:e12983. doi: 10.7717/peerj.12983 (PMC8932311; doi:10.7717/peerj.12983)
Supplement: Supplemental Information 9 — Table showing the mean percentage identity between the input sequence to BadRead (Sievers & Higgins, 2020) and consensus sequences generated with and without running CIAlign cleaning functions for alignments of good, medium and poor quality simulated reads. All statistics are two-sided Mann Whitney U tests. Significance is shown as *** if the p-value is less than 0.001, ** if the p-value is less than 0.01, * if the p-value is less than 0.05 and –if the p-value is greater than 0.05. The median percentage correct nucleotides removed is the proportion of positions in the alignment which match the input sequence to BadRead which were removed by CIAlign for each set of simulated reads. [file peerj-10-12983-s009.xlsx]

## Sheet: Table_S2_alignment_stats_BadRea
	None	Moderate
Mean Consensus Percentage Identity BadRead Good Quality	92.7	99.2
MWU Test Statistic Consensus Percentage Identity BadRead Good Quality	-	0
MWU P-value Consensus Percentage Identity BadRead Good Quality	-	2.22e-35
Significance Consensus Percentage Identity BadRead Good Quality	-	***
Median Percentage Correct Nt Removed BadRead Good Quality	-	3.99
Mean Consensus Percentage Identity BadRead Medium Quality	75.3	84.8
MWU Test Statistic Consensus Percentage Identity BadRead Medium Quality	-	1970
MWU P-value Consensus Percentage Identity BadRead Medium Quality	-	1.37e-13
Significance Consensus Percentage Identity BadRead Medium Quality	-	***
Median Percentage Correct Nt Removed BadRead Medium Quality	-	7.31
Mean Consensus Percentage Identity BadRead Bad Quality	34.1	46.3
MWU Test Statistic Consensus Percentage Identity BadRead Bad Quality	-	2530
MWU P-value Consensus Percentage Identity BadRead Bad Quality	-	1.55e-09
Significance Consensus Percentage Identity BadRead Bad Quality	-	***
Median Percentage Correct Nt Removed BadRead Bad Quality	-	5.03
