# Supplementary material for: CIAlign: A highly customisable command line tool to clean, interpret and visualise multiple sequence alignments
Source: PeerJ. 2022 Mar 15;10:e12983. doi: 10.7717/peerj.12983 (PMC8932311; doi:10.7717/peerj.12983)
Supplement: Supplemental Information 10 — Results of running CIAlign cleaning functions with relaxed, moderate and stringent parameter values on alignments of nucleotide and amino acid sequences simulated using either EvolvAGene (Bahr et al., 2001) or INDELible (Sievers & Higgins, 2018) and aligned with a large number of different alignment tools. For each stringency level, the median percentage of correctly aligned pairs of residues (Sievers et al., 2013) removed (identified by comparison with a benchmark alignment), proportion of total nucleotides (i.e. non-gap positions) removed, proportion of gaps removed and proportion of positions (gap or non-gap) removed have been calculated for EvolvAGene and INDELible. The percentage of gaps is the percentage of gaps over total positions in the input alignment. Number of internal gaps, length of internal gaps and mean pairwise identity are also calculated for the input alignment only. Mean pairwise identity is the mean value of the output of the CIAlign make_similarity_matrix_input function. The mean normalised Robinson-Foulds distance (Hall, 2008) and Quartet divergence (Fletcher & Yang, 2009) are based on comparison with benchmark trees for EvolvAGene and INDELible. Consensus percentage identity is between the input sequence to EvolvAGene and a consensus sequence based on an alignment of the simulated sequences generated by this tool. All statistics are two-sided Mann Whitney U tests comparing the alignment without running CIAlign to the alignment after running CIAlign with the specified parameters. Significance is shown as *** if the p-value is less than 0.001, ** if the p-value is less than 0.01, * if the p-value is less than 0.05 and –if the p-value is greater than 0.05. [file peerj-10-12983-s010.xlsx]

## Sheet: Table_S3_aligners
Alignment_Tool		Clustal Omega	Clustal Omega	Clustal Omega	Clustal Omega	Clustal W	Clustal W	Clustal W	Clustal W	DECIPHER	DECIPHER	DECIPHER	DECIPHER	Kalign	Kalign	MAFFT Global	MAFFT Global	MAFFT Global	MAFFT Global	MAFFT Local	MAFFT Local	MAFFT Local	MAFFT Local	MUSCLE	MUSCLE	MUSCLE	MUSCLE	POA	POA	POA	POA	PRANK	PRANK	PRANK	PRANK	PRANK +F	PRANK +F	PRANK +F	PRANK +F	PROBCONS	PROBCONS	PROGRAPH	PROGRAPH	PSAlign	PSAlign	T-COFFEE	T-COFFEE	T-COFFEE	T-COFFEE
Aligner_Type		HMM Based	HMM Based	HMM Based	HMM Based	Progressive	Progressive	Progressive	Progressive	Context Based	Context Based	Context Based	Context Based	Progressive	Progressive	Progressive	Progressive	Progressive	Progressive	Iterative	Iterative	Iterative	Iterative	Iterative	Iterative	Iterative	Iterative	Partial Order	Partial Order	Partial Order	Partial Order	Phylogeny Aware	Phylogeny Aware	Phylogeny Aware	Phylogeny Aware	Phylogeny Aware	Phylogeny Aware	Phylogeny Aware	Phylogeny Aware	Consistency Based	Consistency Based	Phylogeny Aware	Phylogeny Aware	Non-heuristic	Non-heuristic	Consistency Based	Consistency Based	Consistency Based	Consistency Based
Type		aa	aa	nt	nt	aa	aa	nt	nt	aa	aa	nt	nt	nt	nt	aa	aa	nt	nt	aa	aa	nt	nt	aa	aa	nt	nt	aa	aa	nt	nt	aa	aa	nt	nt	aa	aa	nt	nt	aa	aa	nt	nt	nt	nt	aa	aa	nt	nt
Simulation_Tool		EvolvAGene	INDELible	EvolvAGene	INDELible	EvolvAGene	INDELible	EvolvAGene	INDELible	EvolvAGene	INDELible	EvolvAGene	INDELible	EvolvAGene	INDELible	EvolvAGene	INDELible	EvolvAGene	INDELible	EvolvAGene	INDELible	EvolvAGene	INDELible	EvolvAGene	INDELible	EvolvAGene	INDELible	EvolvAGene	INDELible	EvolvAGene	INDELible	EvolvAGene	INDELible	EvolvAGene	INDELible	EvolvAGene	INDELible	EvolvAGene	INDELible	EvolvAGene	INDELible	EvolvAGene	INDELible	EvolvAGene	INDELible	EvolvAGene	INDELible	EvolvAGene	INDELible
Median % Correct Pairs Removed	Relaxed	0.127	0.362	0.11	0.213	0.131	0.146	0.132	0.168	0	0	0.151	0.167	0.116	0.0606	0.139	0.444	0.137	0.514	0.132	0.322	0.134	0.266	0.144	0.183	0.13	0.571	0.17	1.81	0.19	1.51	0.14	1.06	0.161	2.32	0.138	1.05	0.162	2.56	0.146	0.332	0.15	2.86	0.177	1.7	0.142	0.374	0.144	0.361
Median % Correct Pairs Removed	Moderate	1.2	0.847	0.183	0.555	1.3	0.24	0.188	0.24	0	0	0.544	0.209	0.163	0.359	1.31	1.4	0.668	2.27	1.35	0.918	0.671	0.775	1.25	0.436	0.583	1.53	0.735	2.63	0.38	2.12	1.32	2.82	0.666	6.5	1.32	3.06	0.662	5.27	1.15	0.762	0.718	5.3	0.501	4.29	1.11	1.06	0.253	0.468
Median % Correct Pairs Removed	Stringent	3.08	3.23	24.5	2.05	3.12	1.52	2.57	2.38	0.0904	0	3.5	0.953	4.44	5.73	3.52	3.72	3.62	4.36	3.49	2.94	3.43	2.98	3.55	2.65	3.55	5.72	3.26	4.69	2.47	5.3	3.73	5.67	3.63	10.6	3.73	6.05	3.65	8.17	3.45	2.5	3.48	8.44	2.97	8.14	3.23	2.79	2.37	4.38
Median % Gaps Removed	Relaxed	53.3	46.2	39.3	32.6	55.7	57	60.2	25.2	37.2	0	64.2	46.6	71.7	68	61.8	61.9	62.8	51.1	62	67.7	62.7	50.8	60.7	67.7	64.6	50.7	59.5	62.1	65.9	62.5	63.9	64.1	64.9	64.7	64.2	67.8	65.4	72.4	64.7	76.2	65.6	72.4	67.6	74.2	61.8	73.3	67.6	72.9
Median % Gaps Removed	Moderate	53.3	46.2	41.7	32.6	55.7	57	60.5	25.2	37.2	0	64.2	46.6	72.4	68	61.8	61.9	62.8	51.1	62	67.7	62.7	50.8	60.7	67.7	64.6	50.7	59.5	62.1	65.9	62.5	63.9	64.1	64.9	64.7	64.2	67.8	65.4	72.4	64.7	76.2	65.6	72.4	67.6	74.2	61.8	73.3	67.6	72.9
Median % Gaps Removed	Stringent	53.3	46.2	56.3	33.3	55.7	57	62.2	25.8	37.2	0	64.6	47.2	75.8	68.5	61.8	61.9	63	51.1	62	67.7	62.7	50.8	60.7	67.7	64.6	50.7	59.5	62.1	66	62.5	63.9	64.1	65.2	64.7	64.2	67.8	65.5	72.4	64.7	76.2	66.5	72.4	67.8	74.2	61.8	73.3	68.1	72.9
Median % Nucleotides Removed	Relaxed	1.3	2.36	0.959	1.29	1.4	1.69	1.43	0.729	0.739	0	1.55	1.15	1.73	1.38	1.62	3.39	1.55	3.42	1.57	2.92	1.51	1.99	1.58	2.17	1.59	2.94	1.83	9.08	1.99	8.54	1.64	5.72	1.76	8.43	1.65	6.31	1.79	8.99	1.64	3.58	1.71	11.2	1.89	8.45	1.62	3.5	1.63	3.5
Median % Nucleotides Removed	Moderate	2.14	3.8	1.2	1.84	2.17	1.86	1.71	0.86	0.81	0	2.17	1.22	1.84	1.63	2.33	4.25	2.31	4.27	2.38	3.53	2.19	2.42	2.34	2.68	2.24	3.8	2.43	10.5	2.36	9.72	2.53	6.93	2.38	10.1	2.51	7.25	2.38	10.5	2.38	4.11	2.29	12.8	2.49	9.8	2.35	4.63	2.02	3.68
Median % Nucleotides Removed	Stringent	3.12	4.6	14.1	2.9	3.07	2.64	2.7	2.14	1.01	0	3.43	1.87	3.46	3.22	3.48	5.2	3.48	4.82	3.48	4.49	3.42	3.06	3.46	3.54	3.47	5.36	3.72	12.4	3.5	12.4	3.64	8.52	3.66	12	3.68	9.02	3.67	11.8	3.47	4.86	3.64	14.3	3.63	12.3	3.39	5.15	3.25	5.87
Median % Positions Removed	Relaxed	5.95	8.89	4.12	4.24	6.9	6.89	6.87	2.67	3.12	0	7.67	4.36	8.54	7.33	7.9	12.7	7.6	12.2	7.87	11.9	7.59	7.41	7.66	9.8	7.8	10.3	8.99	28.1	9.79	27.4	8.17	19.6	8.32	27.1	8.3	22.1	8.81	29.9	8.02	15.7	8.54	36	9.84	28.9	7.96	14.9	8.25	15.1
Median % Positions Removed	Moderate	7	9.9	4.65	4.89	7.5	7.2	7.25	2.99	3.45	0	8.11	4.6	8.65	7.64	8.49	13	8.48	12.9	8.62	12.3	8.34	7.81	8.53	10	8.44	11.2	9.37	28.6	10.1	27.9	9.12	20.3	9.12	27.7	9.46	22.7	9.49	30.9	8.97	15.9	9.01	36.7	10.3	29.8	8.42	15.7	8.83	15.4
Median % Positions Removed	Stringent	7.83	11.4	17.7	5.74	8.58	8.33	8.58	4.31	3.59	0	9.74	5.63	12.1	9.03	9.95	13.9	10.2	13.3	10	13.1	9.49	8.23	9.78	10.9	10.2	12.4	10.6	29.8	11.3	29.8	10.8	21.7	10.5	28.7	10.8	24.4	10.7	31.4	9.78	16.8	10.6	37.4	11.3	31.4	9.62	16.2	10.1	17.1
% Gaps	None	9.63	15.4	8.2	9.99	10	10.4	9.52	8.17	6.96	8.94	10.1	8.31	10.3	8.92	11.1	15.8	10.7	18.1	11.1	14.5	10.5	12.3	10.9	12.4	10.9	15.9	12.6	37.5	12.6	35.4	11.6	24.6	11.8	31.6	11.7	25.4	11.9	34.7	10.9	17.6	11.4	39.3	12.4	30.9	11	18.2	10.9	16.8
% Gaps	Relaxed	9.63	15.4	8.2	9.99	10	10.4	9.52	8.17	6.96	8.94	10.1	8.31	10.3	8.92	11.1	15.8	10.7	18.1	11.1	14.5	10.5	12.3	10.9	12.4	10.9	15.9	12.6	37.5	12.6	35.4	11.6	24.6	11.8	31.6	11.7	25.4	11.9	34.7	10.9	17.6	11.4	39.3	12.4	30.9	11	18.2	10.9	16.8
% Gaps	Moderate	9.63	15.4	8.2	9.99	10	10.4	9.52	8.17	6.96	8.94	10.1	8.31	10.3	8.92	11.1	15.8	10.7	18.1	11.1	14.5	10.5	12.3	10.9	12.4	10.9	15.9	12.6	37.5	12.6	35.4	11.6	24.6	11.8	31.6	11.7	25.4	11.9	34.7	10.9	17.6	11.4	39.3	12.4	30.9	11	18.2	10.9	16.8
% Gaps	Stringent	9.63	15.4	8.2	9.99	10	10.4	9.52	8.17	6.96	8.94	10.1	8.31	10.3	8.92	11.1	15.8	10.7	18.1	11.1	14.5	10.5	12.3	10.9	12.4	10.9	15.9	12.6	37.5	12.6	35.4	11.6	24.6	11.8	31.6	11.7	25.4	11.9	34.7	10.9	17.6	11.4	39.3	12.4	30.9	11	18.2	10.9	16.8
Mean Number of Internal Gaps per Alignment	None	96	77	73	47	106	53	117	53	31	0	112	35	161	91	125	86	121	48	124	89	117	46	119	79	127	70	149	275	222	307	135	145	142	132	136	157	144	154	125	133	137	154	162	319	124	138	157	221
Mean Number of Internal Gaps per Alignment	Relaxed	96	77	73	47	106	53	117	53	31	0	112	35	161	91	125	86	121	48	124	89	117	46	119	79	127	70	149	275	222	307	135	145	142	132	136	157	144	154	125	133	137	154	162	319	124	138	157	221
Mean Number of Internal Gaps per Alignment	Moderate	96	77	73	47	106	53	117	53	31	0	112	35	161	91	125	86	121	48	124	89	117	46	119	79	127	70	149	275	222	307	135	145	142	132	136	157	144	154	125	133	137	154	162	319	124	138	157	221
Mean Number of Internal Gaps per Alignment	Stringent	96	77	73	47	106	53	117	53	31	0	112	35	161	91	125	86	121	48	124	89	117	46	119	79	127	70	149	275	222	307	135	145	142	132	136	157	144	154	125	133	137	154	162	319	124	138	157	221
Mean Internal Gap Length	None	267	303	639	165	285	196	803	113	101	1	883	130	908	188	326	360	955	370	322	323	927	224	313	263	973	326	367	931	1128	856	346	615	1062	857	349	646	1073	987	323	424	1020	1142	1126	843	321	441	977	390
Mean Internal Gap Length	Relaxed	267	303	639	165	285	196	803	113	101	1	883	130	908	188	326	360	955	370	322	323	927	224	313	263	973	326	367	931	1128	856	346	615	1062	857	349	646	1073	987	323	424	1020	1142	1126	843	321	441	977	390
Mean Internal Gap Length	Moderate	267	303	639	165	285	196	803	113	101	1	883	130	908	188	326	360	955	370	322	323	927	224	313	263	973	326	367	931	1128	856	346	615	1062	857	349	646	1073	987	323	424	1020	1142	1126	843	321	441	977	390
Mean Internal Gap Length	Stringent	267	303	639	165	285	196	803	113	101	1	883	130	908	188	326	360	955	370	322	323	927	224	313	263	973	326	367	931	1128	856	346	615	1062	857	349	646	1073	987	323	424	1020	1142	1126	843	321	441	977	390
Mean Pairwise Identity	None	0.696	0.276	0.665	0.492	0.699	0.26	0.698	0.501	0.405	0.217	0.703	0.498	0.68	0.489	0.715	0.282	0.707	0.511	0.714	0.279	0.705	0.502	0.712	0.276	0.71	0.54	0.717	0.299	0.71	0.602	0.717	0.29	0.71	0.552	0.717	0.289	0.71	0.55	0.71	0.279	0.707	0.534	0.709	0.558	0.709	0.279	0.705	0.566
Mean Pairwise Identity	Relaxed	0.696	0.276	0.665	0.492	0.699	0.26	0.698	0.501	0.405	0.217	0.703	0.498	0.68	0.489	0.715	0.282	0.707	0.511	0.714	0.279	0.705	0.502	0.712	0.276	0.71	0.54	0.717	0.299	0.71	0.602	0.717	0.29	0.71	0.552	0.717	0.289	0.71	0.55	0.71	0.279	0.707	0.534	0.709	0.558	0.709	0.279	0.705	0.566
Mean Pairwise Identity	Moderate	0.696	0.276	0.665	0.492	0.699	0.26	0.698	0.501	0.405	0.217	0.703	0.498	0.68	0.489	0.715	0.282	0.707	0.511	0.714	0.279	0.705	0.502	0.712	0.276	0.71	0.54	0.717	0.299	0.71	0.602	0.717	0.29	0.71	0.552	0.717	0.289	0.71	0.55	0.71	0.279	0.707	0.534	0.709	0.558	0.709	0.279	0.705	0.566
Mean Pairwise Identity	Stringent	0.696	0.276	0.665	0.492	0.699	0.26	0.698	0.501	0.405	0.217	0.703	0.498	0.68	0.489	0.715	0.282	0.707	0.511	0.714	0.279	0.705	0.502	0.712	0.276	0.71	0.54	0.717	0.299	0.71	0.602	0.717	0.29	0.71	0.552	0.717	0.289	0.71	0.55	0.71	0.279	0.707	0.534	0.709	0.558	0.709	0.279	0.705	0.566
Normalised Robinson-Foulds Distance	None	0.02	0.016	0.054	0.348	0.018	0.044	0.042	0.332	0.214	0.77	0.04	0.434	0.084	0.776	0.022	0.022	0.044	0.53	0.022	0.01	0.054	0.432	0.02	0.022	0.038	0.492	0.028	0.134	0.044	0.504	0.02	0.048	0.038	0.582	0.02	0.05	0.038	0.594	0.02	0.018	0.052	0.818	0.0525	0.57	0.024	0.026	0.05	0.5
Normalised Robinson-Foulds Distance	Relaxed	0.02	0.014	0.054	0.346	0.018	0.044	0.044	0.328	0.214	0.77	0.044	0.43	0.084	0.778	0.02	0.024	0.044	0.518	0.022	0.012	0.05	0.434	0.02	0.024	0.038	0.49	0.026	0.138	0.044	0.504	0.02	0.05	0.038	0.592	0.02	0.054	0.038	0.596	0.018	0.02	0.052	0.826	0.0525	0.57	0.022	0.026	0.046	0.506
Normalised Robinson-Foulds Distance	Moderate	0.02	0.016	0.055	0.354	0.018	0.042	0.048	0.328	0.216	0.77	0.046	0.422	0.0777	0.778	0.026	0.024	0.046	0.52	0.024	0.012	0.052	0.446	0.024	0.026	0.04	0.506	0.026	0.134	0.04	0.51	0.022	0.05	0.04	0.58	0.022	0.054	0.04	0.598	0.018	0.022	0.054	0.824	0.0566	0.57	0.022	0.024	0.046	0.51
Normalised Robinson-Foulds Distance	Stringent	0.02	0.016	0.0608	0.36	0.022	0.042	0.0478	0.335	0.217	0.755	0.048	0.42	0.0712	0.765	0.026	0.026	0.052	0.52	0.024	0.012	0.058	0.452	0.024	0.02	0.046	0.494	0.03	0.142	0.0425	0.532	0.022	0.054	0.038	0.59	0.022	0.056	0.042	0.61	0.02	0.024	0.0565	0.82	0.0571	0.578	0.022	0.026	0.05	0.518
Normalised Robinson-Foulds Distance MWU P-Value	Relaxed	0.998	0.791	0.999	0.979	0.998	0.999	0.864	0.885	0.999	0.999	0.724	0.908	0.999	0.98	0.82	0.816	0.999	0.654	0.998	0.759	0.997	0.921	0.998	0.816	0.854	0.846	0.838	0.785	0.999	0.883	0.998	0.87	0.998	0.765	0.998	0.843	0.998	0.949	0.804	0.812	0.999	0.798	0.999	0.971	0.822	0.998	0.997	0.805
Normalised Robinson-Foulds Distance MWU P-Value	Moderate	0.998	0.998	0.946	0.735	0.82	0.864	0.612	0.885	0.93	0.999	0.599	0.756	0.963	0.963	0.666	0.816	0.86	0.732	0.673	0.759	0.876	0.614	0.654	0.647	0.832	0.692	0.838	0.964	0.726	0.743	0.82	0.87	0.852	0.98	0.82	0.745	0.852	0.953	0.984	0.64	0.87	0.875	0.744	0.923	0.982	0.824	0.997	0.704
Normalised Robinson-Foulds Distance MWU P-Value	Stringent	0.998	0.998	0.849	0.624	0.489	0.864	0.685	0.92	0.84	0.712	0.488	0.671	0.87	0.727	0.666	0.647	0.582	0.749	0.673	0.759	0.747	0.464	0.654	0.984	0.453	0.903	0.843	0.72	0.888	0.369	0.82	0.814	0.713	0.795	0.82	0.628	0.712	0.693	0.831	0.491	0.501	0.955	0.719	0.836	0.982	0.827	0.999	0.564
Normalised Robinson-Foulds Distance MWU Test Statistic	Relaxed	5000	5050	5000	4989	5000	5000	4950	5058	5000	5000	4903	5046	5000	4990	5050	4951	5000	5177	5000	4950	5001	4960	5000	4951	4951	5077	5050	4897	5000	4941	5000	4951	5000	4881	5000	4942	5000	4974	5049	4950	5000	4901	4900	4915	5049	5000	5001	4902
Normalised Robinson-Foulds Distance MWU Test Statistic	Moderate	5000	5000	4979	4867	4954	5049	4851	5058	4965	5000	4854	5124	5015	4982	4900	4951	4951	5136	4906	4950	4953	4800	4900	4902	4943	4843	5050	4982	5098	4869	4950	4951	4950	4989	4950	4905	4950	4976	5004	4900	4951	4939	4803	4938	5005	5049	5001	4849
Normalised Robinson-Foulds Distance MWU Test Statistic	Stringent	5000	5000	4892	4806	4855	5049	4882	4959	4921	5146	4806	5169	5002	5134	4900	4902	4844	5127	4906	4950	4903	4711	4900	5004	4795	5048	4950	4865	5040	4643	4950	4930	4901	4896	4950	4857	4901	4843	4955	4850	4795	4978	4793	4820	5005	5048	5000	4771
Quartet Divergence	None	0.011	0.0149	0.031	0.244	0.0103	0.032	0.0241	0.236	0.141	0.533	0.0227	0.296	0.0463	0.559	0.0126	0.0171	0.0239	0.366	0.0126	0.008	0.0297	0.288	0.0114	0.0171	0.0209	0.334	0.016	0.108	0.0253	0.355	0.0114	0.0411	0.0209	0.404	0.0114	0.0423	0.0209	0.409	0.0114	0.0126	0.029	0.578	0.0299	0.388	0.0137	0.0229	0.0269	0.339
Quartet Divergence	Relaxed	0.011	0.0137	0.031	0.244	0.0103	0.032	0.0253	0.232	0.141	0.533	0.025	0.292	0.0463	0.56	0.0114	0.0194	0.0239	0.358	0.0126	0.0103	0.0279	0.295	0.0114	0.0183	0.0213	0.333	0.0149	0.112	0.0253	0.351	0.0114	0.0434	0.0209	0.407	0.0114	0.0434	0.0209	0.411	0.0103	0.0149	0.029	0.583	0.0299	0.386	0.0126	0.0229	0.025	0.342
Quartet Divergence	Moderate	0.011	0.0149	0.0321	0.248	0.0103	0.0297	0.0287	0.232	0.142	0.534	0.0273	0.287	0.0438	0.562	0.0149	0.0194	0.0261	0.359	0.0137	0.0103	0.0301	0.304	0.0137	0.0194	0.0231	0.339	0.0149	0.109	0.023	0.352	0.0126	0.0423	0.0231	0.4	0.0126	0.0451	0.0231	0.414	0.0103	0.016	0.0313	0.584	0.0322	0.39	0.0126	0.0206	0.025	0.341
Quartet Divergence	Stringent	0.011	0.016	0.0395	0.251	0.0126	0.0286	0.0291	0.237	0.142	0.532	0.0279	0.285	0.0426	0.551	0.0149	0.0217	0.0297	0.362	0.0137	0.0103	0.0331	0.31	0.0137	0.0149	0.0266	0.333	0.0171	0.116	0.0247	0.37	0.0126	0.0434	0.0224	0.403	0.0126	0.0463	0.0243	0.421	0.0114	0.0183	0.0334	0.581	0.0328	0.393	0.0126	0.0217	0.0269	0.358
Quartet Divergence MWU P-Value	Relaxed	0.998	0.801	0.999	0.986	0.998	0.999	0.864	0.862	0.999	0.999	0.724	0.87	0.999	0.965	0.82	0.806	0.999	0.672	0.998	0.752	0.996	0.72	0.998	0.819	0.854	0.919	0.838	0.777	0.999	0.934	0.998	0.858	0.998	0.87	0.998	0.886	0.998	0.922	0.804	0.799	0.999	0.844	0.999	0.884	0.822	0.998	0.997	0.858
Quartet Divergence MWU P-Value	Moderate	0.998	0.998	0.946	0.864	0.82	0.844	0.589	0.862	0.939	0.997	0.58	0.698	0.964	0.89	0.666	0.806	0.835	0.785	0.673	0.752	0.849	0.428	0.654	0.654	0.81	0.817	0.838	0.934	0.726	0.997	0.82	0.882	0.83	0.973	0.82	0.765	0.83	0.854	0.984	0.632	0.844	0.844	0.747	0.986	0.982	0.817	0.997	0.895
Quartet Divergence MWU P-Value	Stringent	0.998	0.985	0.855	0.801	0.489	0.817	0.682	0.945	0.843	0.876	0.474	0.587	0.807	0.822	0.666	0.63	0.559	0.908	0.673	0.752	0.721	0.265	0.654	0.98	0.437	0.886	0.843	0.685	0.888	0.51	0.82	0.874	0.692	0.993	0.82	0.657	0.691	0.645	0.831	0.475	0.481	0.967	0.723	0.883	0.982	0.82	0.999	0.436
Quartet Divergence MWU Test Statistic	Relaxed	5000	5047	5000	4992	5000	5000	4950	5071	5000	5000	4903	5067	5000	4981	5050	4948	5000	5173	5000	4948	5002	4854	5000	4952	4951	5042	5050	4891	5000	5034	5000	4947	5000	4932	5000	4958	5000	4959	5049	4946	5000	4919	4900	4959	5049	5000	5001	4926
Quartet Divergence MWU Test Statistic	Moderate	5000	5000	4979	4930	4954	5057	4842	5071	4969	4998	4846	5158	5015	4943	4900	4948	4942	5112	4906	4948	4943	4677	4900	4904	4936	4905	5050	4968	5098	5002	4950	4956	4943	5014	4950	4912	4943	4924	5004	4897	4941	4919	4804	4908	5005	5051	5001	4945
Quartet Divergence MWU Test Statistic	Stringent	5000	4996	4894	4897	4855	5067	4881	4971	4921	4935	4799	5222	5028	5092	4900	4897	4835	5047	4906	4948	4892	4546	4900	5005	4787	5059	4950	4844	5040	4730	4950	4953	4894	5004	4950	4869	4893	4811	4955	4844	4785	4982	4795	4841	5005	5050	5000	4681
Consensus Percentage Identity	None	83.1	-	67.7	-	82.4	-	67.4	-	48.4	-	67.3	-	66.9	-	81.9	-	67	-	82	-	67	-	82.2	-	66.9	-	80.4	-	65.7	-	81.4	-	66.4	-	81.4	-	66.3	-	82.2	-	66.6	-	65.9	-	82	-	66.9	-
Consensus Percentage Identity	Relaxed	88	-	69.9	-	87.8	-	71.3	-	48.2	-	71.8	-	71.1	-	88.9	-	72	-	88.9	-	71.9	-	88.8	-	72.1	-	88.1	-	71.5	-	89.1	-	72.2	-	89.1	-	72.2	-	89	-	72	-	71.8	-	88.7	-	72	-
Consensus Percentage Identity	Moderate	88	-	70	-	87.7	-	71.4	-	48.2	-	71.8	-	71.1	-	88.8	-	72	-	88.9	-	71.9	-	88.7	-	72.1	-	88.3	-	71.6	-	89	-	72.2	-	89.1	-	72.2	-	89	-	72	-	71.8	-	88.6	-	72	-
Consensus Percentage Identity	Stringent	87.9	-	70.1	-	87.7	-	71.2	-	48.2	-	71.8	-	71.1	-	88.7	-	72	-	88.7	-	71.9	-	88.6	-	72.1	-	88.5	-	71.6	-	88.9	-	72.1	-	88.9	-	72.1	-	88.9	-	72	-	71.8	-	88.5	-	72	-
Consensus Percentage Identity MWU P-Value	Relaxed	1.86e-09	-	1.13e-06	-	6.2e-11	-	8.24e-17	-	0.747	-	1.36e-21	-	5.28e-17	-	4.48e-17	-	4.16e-23	-	5.81e-17	-	3.18e-21	-	5.21e-16	-	5.09e-24	-	8.08e-19	-	3.57e-26	-	2.65e-19	-	4.68e-26	-	1.48e-19	-	3.13e-26	-	8.69e-17	-	1.3e-24	-	8.72e-26	-	4.58e-16	-	1.99e-23	-
Consensus Percentage Identity MWU P-Value	Moderate	1.67e-09	-	8.53e-07	-	1.16e-10	-	6.77e-17	-	0.757	-	1.38e-21	-	5.17e-17	-	5.57e-17	-	2.36e-23	-	8e-17	-	1.79e-21	-	7.26e-16	-	3.68e-24	-	2.01e-19	-	2.54e-26	-	2.56e-19	-	4.94e-26	-	1.47e-19	-	2.89e-26	-	1.16e-16	-	1.14e-24	-	1.13e-25	-	6.25e-16	-	1.87e-23	-
Consensus Percentage Identity MWU P-Value	Stringent	3e-09	-	1.42e-07	-	1.71e-10	-	1.18e-15	-	0.754	-	4.72e-21	-	1.98e-17	-	4.1e-16	-	4.86e-23	-	5.01e-16	-	2.64e-21	-	3.5e-15	-	1.25e-23	-	6.04e-20	-	3.05e-26	-	2.04e-18	-	3.46e-25	-	1.14e-18	-	9.84e-26	-	4.05e-16	-	8.88e-25	-	4.34e-25	-	1.74e-15	-	5.99e-23	-
Consensus Percentage Identity MWU Test Statistic	Relaxed	2540	-	3007	-	2323	-	1591	-	5132	-	1093	-	1570	-	1562	-	948	-	1574	-	1129	-	1682	-	863	-	1374	-	668	-	1323	-	679	-	1297	-	663	-	1594	-	808	-	667	-	1675	-	918	-
Consensus Percentage Identity MWU Test Statistic	Moderate	2533	-	2985	-	2362	-	1582	-	5127	-	1094	-	1569	-	1572	-	925	-	1590	-	1105	-	1698	-	850	-	1311	-	655	-	1322	-	681	-	1297	-	660	-	1608	-	803	-	677	-	1691	-	915	-
Consensus Percentage Identity MWU Test Statistic	Stringent	2572	-	2846	-	2386	-	1723	-	5129	-	1146	-	1523	-	1670	-	954	-	1680	-	1121	-	1778	-	899	-	1257	-	662	-	1416	-	756	-	1389	-	707	-	1669	-	793	-	729	-	1742	-	963	-
[truncated: 2 more columns]
