# Supplementary material for: CIAlign: A highly customisable command line tool to clean, interpret and visualise multiple sequence alignments
Source: PeerJ. 2022 Mar 15;10:e12983. doi: 10.7717/peerj.12983 (PMC8932311; doi:10.7717/peerj.12983)
Supplement: Supplemental Information 11 — Table showing the impact of running other trimming tools –TrimAl (Capella-Gutiérrez, Silla-Martínez & Gabaldón, 2009), GBlocks (Talavera & Castresana, 2007) and ZORRO (Wu, Chatterji & Eisen, 2012)—and the CIAlign cleaning functions with relaxed, moderate and stringent parameter values on alignments of sequences simulated using either EvolvAGene (Bahr et al., 2001) or INDELible (Sievers & Higgins, 2018). For each stringency level and trimming tool, the median percentage of correctly aligned pairs of residues (Sievers et al., 2013) removed (identified by comparison with a benchmark alignment), proportion of total nucleotides (i.e. non-gap positions) removed, proportion of gaps removed and proportion of positions (gap or non-gap) removed have been calculated for EvolvAGene and INDELible. The mean normalised Robinson-Foulds distance (Hall, 2008) and Quartet divergence (Fletcher & Yang, 2009) are based on comparison with benchmark trees for EvolvAGene and INDELible. Consensus percentage identity is between the input sequence to EvolvAGene and a consensus sequence based on an alignment of the simulated sequences generated by this tool. All statistics are two-sided Mann Whitney U tests comparing the alignment without running CIAlign to the alignment after running CIAlign with the specified parameters. Significance is shown as *** if the p-value is less than 0.001, ** if the p-value is less than 0.01, * if the p-value is less than 0.05 and –if the p-value is greater than 0.05. [file peerj-10-12983-s011.xlsx]

## Sheet: Table_S4_trimmers
		None	GBlocks	Trimal	ZORRO	CIAlign_Relaxed	CIAlign_Moderate	CIAlign_Stringent
% Correct Pairs Removed	Mean	-	22.4	1.42	0.148	0.188	0.749	3.76
% Correct Pairs Removed	MWU Test Statistic vs CIAlign Relaxed	-	895	97895	297492	-	-	-
% Correct Pairs Removed	MWU P-value vs CIAlign Relaxed	-	1.27e-261	5.84e-128	0.00743	-	-	-
% Correct Pairs Removed	Significance vs CIAlign Relaxed	-	***	***	**	-	-	-
% Correct Pairs Removed	MWU Test Statistic vs CIAlign Moderate	-	7097	238585	177884	-	-	-
% Correct Pairs Removed	MWU P-value vs CIAlign Moderate	-	1.2e-251	6.23e-19	1.12e-53	-	-	-
% Correct Pairs Removed	Significance vs CIAlign Moderate	-	***	***	***	-	-	-
% Correct Pairs Removed	MWU Test Statistic vs CIAlign Stringent	-	51672	233925	66187	-	-	-
% Correct Pairs Removed	MWU P-value vs CIAlign Stringent	-	1.08e-185	6.1e-21	2.14e-166	-	-	-
% Correct Pairs Removed	Significance vs CIAlign Stringent	-	***	***	***	-	-	-
% Nucleotides Removed	Mean	-	29.6	4.62	1.67	1.72	2.4	3.86
% Nucleotides Removed	MWU Test Statistic vs CIAlign Relaxed	-	0	108758	306672	-	-	-
% Nucleotides Removed	MWU P-value vs CIAlign Relaxed	-	4.45e-263	5.76e-116	0.0746	-	-	-
% Nucleotides Removed	Significance vs CIAlign Relaxed	-	***	***	-	-	-	-
% Nucleotides Removed	MWU Test Statistic vs CIAlign Moderate	-	334	162674	268899	-	-	-
% Nucleotides Removed	MWU P-value vs CIAlign Moderate	-	1.55e-262	2.65e-65	1.6e-08	-	-	-
% Nucleotides Removed	Significance vs CIAlign Moderate	-	***	***	***	-	-	-
% Nucleotides Removed	MWU Test Statistic vs CIAlign Stringent	-	19169	277658	168847	-	-	-
% Nucleotides Removed	MWU P-value vs CIAlign Stringent	-	8.7e-233	2.3e-06	1.92e-60	-	-	-
% Nucleotides Removed	Significance vs CIAlign Stringent	-	***	***	***	-	-	-
% Gaps Removed	Mean	-	100	76.7	54.7	51.9	52	54.8
% Gaps Removed	MWU Test Statistic vs CIAlign Relaxed	-	0	103925	279737	-	-	-
% Gaps Removed	MWU P-value vs CIAlign Relaxed	-	2.61e-300	3.15e-121	6.59e-06	-	-	-
% Gaps Removed	Significance vs CIAlign Relaxed	-	***	***	***	-	-	-
% Gaps Removed	MWU Test Statistic vs CIAlign Moderate	-	0	104688	282329	-	-	-
% Gaps Removed	MWU P-value vs CIAlign Moderate	-	2.61e-300	2.17e-120	2.28e-05	-	-	-
% Gaps Removed	Significance vs CIAlign Moderate	-	***	***	***	-	-	-
% Gaps Removed	MWU Test Statistic vs CIAlign Stringent	-	0	116994	308205	-	-	-
% Gaps Removed	MWU P-value vs CIAlign Stringent	-	2.61e-300	2.84e-107	0.101	-	-	-
% Gaps Removed	Significance vs CIAlign Stringent	-	***	***	-	-	-	-
% Positions Removed	Mean	-	38.1	12.8	7.64	7.41	8.1	9.96
% Positions Removed	MWU Test Statistic vs CIAlign Relaxed	-	969	142154	296899	-	-	-
% Positions Removed	MWU P-value vs CIAlign Relaxed	-	1.68e-261	7.58e-83	0.00621	-	-	-
% Positions Removed	Significance vs CIAlign Relaxed	-	***	***	**	-	-	-
% Positions Removed	MWU Test Statistic vs CIAlign Moderate	-	1486	164361	313731	-	-	-
% Positions Removed	MWU P-value vs CIAlign Moderate	-	1.16e-260	5.89e-64	0.249	-	-	-
% Positions Removed	Significance vs CIAlign Moderate	-	***	***	-	-	-	-
% Positions Removed	MWU Test Statistic vs CIAlign Stringent	-	16213	235879	238959	-	-	-
% Positions Removed	MWU P-value vs CIAlign Stringent	-	2.46e-237	4.38e-20	8.92e-19	-	-	-
% Positions Removed	Significance vs CIAlign Stringent	-	***	***	***	-	-	-
Normalised Robinson-Foulds Distance	Mean	0.241	0.289	0.248	0.24	0.24	0.246	0.252
Normalised Robinson-Foulds Distance	MWU Test Statistic vs Untrimmed	-	297982	315887	319850	319510	316553	312115
Normalised Robinson-Foulds Distance	MWU P-value vs Untrimmed	-	0.00616	0.32	0.493	0.478	0.347	0.185
Normalised Robinson-Foulds Distance	Significance vs Untrimmed	-	**	-	-	-	-	-
Quartet Divergence	Mean	0.162	0.197	0.167	0.163	0.163	0.167	0.171
Quartet Divergence	MWU Test Statistic vs Untrimmed	-	298346	315968	319138	319875	316179	311455
Quartet Divergence	MWU P-value vs Untrimmed	-	0.00713	0.324	0.461	0.494	0.332	0.167
Quartet Divergence	Significance vs Untrimmed	-	**	-	-	-	-	-
Consensus Percentage Identity	Mean	67.1	58	70.6	71	71.5	71.5	71.5
Consensus Percentage Identity	MWU Test Statistic vs CIAlign Relaxed	-	285446	287946	283969	-	-	-
Consensus Percentage Identity	MWU P-value vs CIAlign Relaxed	-	9.22e-05	0.000261	4.83e-05	-	-	-
Consensus Percentage Identity	Significance vs CIAlign Relaxed	-	***	***	***	-	-	-
Consensus Percentage Identity	MWU Test Statistic vs CIAlign Moderate	-	285369	288245	284265	-	-	-
Consensus Percentage Identity	MWU P-value vs CIAlign Moderate	-	8.93e-05	0.000295	5.5e-05	-	-	-
Consensus Percentage Identity	Significance vs CIAlign Moderate	-	***	***	***	-	-	-
Consensus Percentage Identity	MWU Test Statistic vs CIAlign Stringent	-	285452	288020	283886	-	-	-
Consensus Percentage Identity	MWU P-value vs CIAlign Stringent	-	9.25e-05	0.000269	4.65e-05	-	-	-
Consensus Percentage Identity	Significance vs CIAlign Stringent	-	***	***	***	-	-	-
